# Supplementary material
Source: PubMed Central journal article supplement (PMC4142438)
Supplement: NIHMS622412-supplement-ESI.pdf [file NIHMS622412-supplement-ESI.pdf]

## Supporting Information

| Systematic name | Gene Name |
|-----------------|-----------|-----------------|-----------|-----------------|-----------|-----------------|-----------|
| YMR120C         | ADE17     | YER023W         | PRO3      | YIL052C         | RPL34B    | YIL069C         | RPS24B    |
| YMR300C         | ADE4      | YGL062W         | PYC1      | YDL191W         | RPL35A    | YGR027C         | RPS25A    |
| YGR061C         | ADE6      | YBR218C         | PYC2      | YDL136W         | RPL35B    | YLR333C         | RPS25B    |
| YMR169C         | ALD3      | YLR075W         | RPL10     | YLR325C         | RPL38     | YGL189C         | RPS26A    |
| YPR145W         | ASN1      | YPR102C         | RPL11A    | YPR043W         | RPL43A    | YER131W         | RPS26B    |
| YGR124W         | ASN2      | YGR085C         | RPL11B    | YBR031W         | RPL4A     | YOR167C         | RPS28A    |
| YDR168W         | CDC37     | YDL082W         | RPL13A    | YDR012W         | RPL4B     | YLR264W         | RPS28B    |
| YCR005C         | CIT2      | YMR142C         | RPL13B    | YML073C         | RPL6A     | YJR145C         | RPS4A     |
| YLR216C         | CPR6      | YKL006W         | RPL14A    | YLR448W         | RPL6B     | YHR203C         | RPS4B     |
| YML070W         | DAK1      | YHL001W         | RPL14B    | YGL076C         | RPL7A     | YPL090C         | RPS6A     |
| YHR068W         | DYS1      | YIL133C         | RPL16A    | YHL033C         | RPL8A     | YBR181C         | RPS6B     |
| YPL037C         | EGD1      | YKL180W         | RPL17A    | YLL045C         | RPL8B     | YNL096C         | RPS7B     |
| YMR250W         | GAD1      | YJL177W         | RPL17B    | YGL147C         | RPL9A     | YBL072C         | RPS8A     |
| YDL215C         | GDH2      | YNL301C         | RPL18B    | YDL130W         | RPP1B     | YER102W         | RPS8B     |
| YPR160W         | GPH1      | YBL027W         | RPL19B    | YOL039W         | RPP2A     | YPL081W         | RPS9A     |
| YKL152C         | GPM1      | YPL220W         | RPL1A     | YMR230W         | RPS10B    | YBR189W         | RPS9B     |
| YLR192C         | HCR1      | YGL135W         | RPL1B     | YDR025W         | RPS11A    | YOR007C         | SGT2      |
| YCL030C         | HIS4      | YMR242C         | RPL20A    | YBR048W         | RPS11B    | YAL005C         | SSA1      |
| YLL026W         | HSP104    | YOR312C         | RPL20B    | YMR143W         | RPS16A    | YNL209W         | SSB2      |
| YPL240C         | HSP82     | YBR191W         | RPL21A    | YDL083C         | RPS16B    | YLR150W         | STM1      |
| YFR053C         | HXK1      | YPL079W         | RPL21B    | YML024W         | RPS17A    | YBR126C         | TPS1      |
| YBL076C         | ILS1      | YLR061W         | RPL22A    | YDR447C         | RPS17B    | YML100W         | TSL1      |
| YLR432W         | IMD3      | YGL031C         | RPL24A    | YDR450W         | RPS18A    | YJR103W         | URA8      |
| YML056C         | IMD4      | YGR148C         | RPL24B    | YML026C         | RPS18B    | YJR014W         | YJR014W   |
| YOR232W         | MGE1      | YLR344W         | RPL26A    | YML063W         | RPS1B     | YOR251C         | YOR251C   |
| YJL042W         | MHP1      | YGR034W         | RPL26B    | YKR057W         | RPS21A    | YPL009C         | YPL009C   |
| YER165W         | PAB1      | YDR471W         | RPL27B    | YJL136C         | RPS21B    | YNL241C         | ZWF1      |
| YGR087C         | PDC6      | YOR063W         | RPL3      | YGR118W         | RPS23A    |                 |           |
| YGR240C         | PFK1      | YLR406C         | RPL31B    | YPR132W         | RPS23B    |                 |           |
| YMR205C         | PFK2      | YOR234C         | RPL33B    | YER074W         | RPS24A    |                 |           |

**Supplemental Table 1. Roughly a third of detectable exclusively cytoplasmic proteins (117/395) became significantly more insoluble following a two hour heat stress at 42°C (95% confidence level, Z-score  $\geq 1.96$ ).**

| Systematic Name | Gene Name |
|-----------------|-----------|
| YGL234W         | ADE5,7    |
| YOR335C         | ALA1      |
| YGL105W         | ARC1      |
| YDR127W         | ARO1      |
| YGR155W         | CYS4      |
| YPR035W         | GLN1      |
| YCL030C         | HIS4      |
| YMR186W         | HSC82     |
| YDR171W         | HSP42     |
| YPL240C         | HSP82     |
| YER165W         | PAB1      |
| YDR450W         | RPS18A    |
| YHL034C         | SBP1      |
| YAL005C         | SSA1      |
| YDL229W         | SSB1      |
| YNL209W         | SSB2      |
| YKL081W         | TEF4      |
| YIL078W         | THS1      |
| YJL130C         | URA2      |
| YGR094W         | VAS1      |
| YGR234W         | YHB1      |

**Supplemental Table 2. Among the 50 cytoplasmic proteins that co-immunoprecipitate with Hsp82-GFP, a significant number (21) are also known to form intracellular foci** (hypergeometric  $p \leq 10^{-3}$  for proteins identified at the 97.7% confidence level, Z-score  $\geq 2$ ).
